# Supplementary material for: Genomic mutation profile in progressive chronic lymphocytic leukemia patients prior to first-line chemoimmunotherapy with FCR and rituximab maintenance (REM)
Source: PubMed Central journal article supplement (PMC8432772; doi:10.1371/journal.pone.0257353), 2021-09-10

**S1 Fig. MRD association with progression-free survival (A) and overall survival (B).**

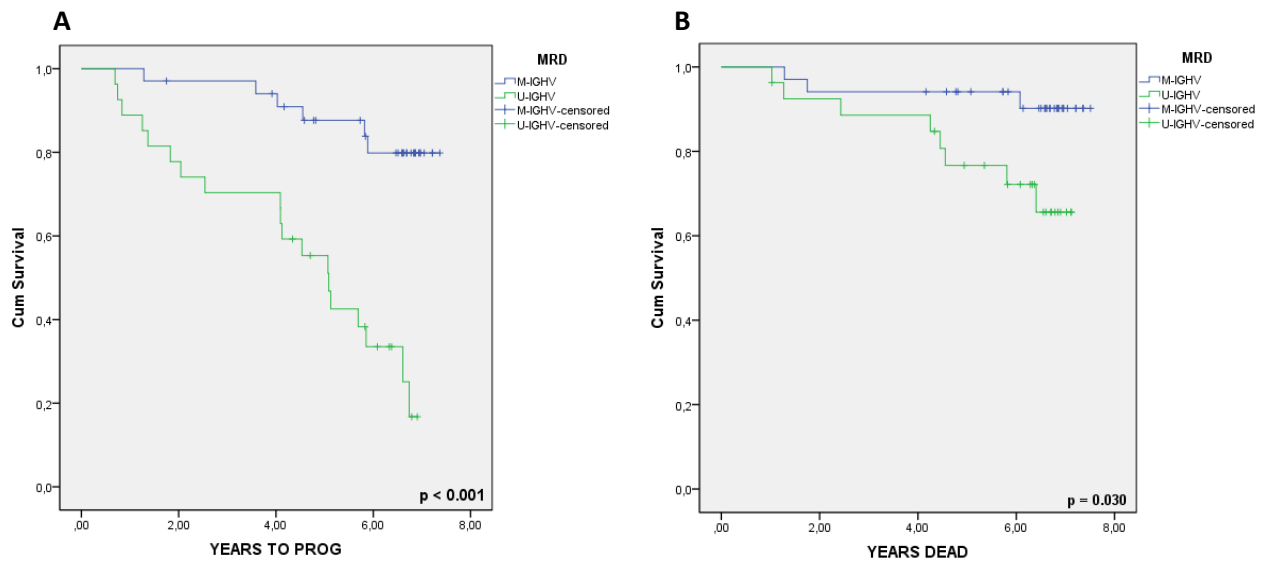

**S2 Fig. Progression-free survival (PFS) and overall survival (OS).** (A) PFS according to TP53/del(17p) and EGR2 status; (B) OS according to TP53/del(17p) status and Binet stage.

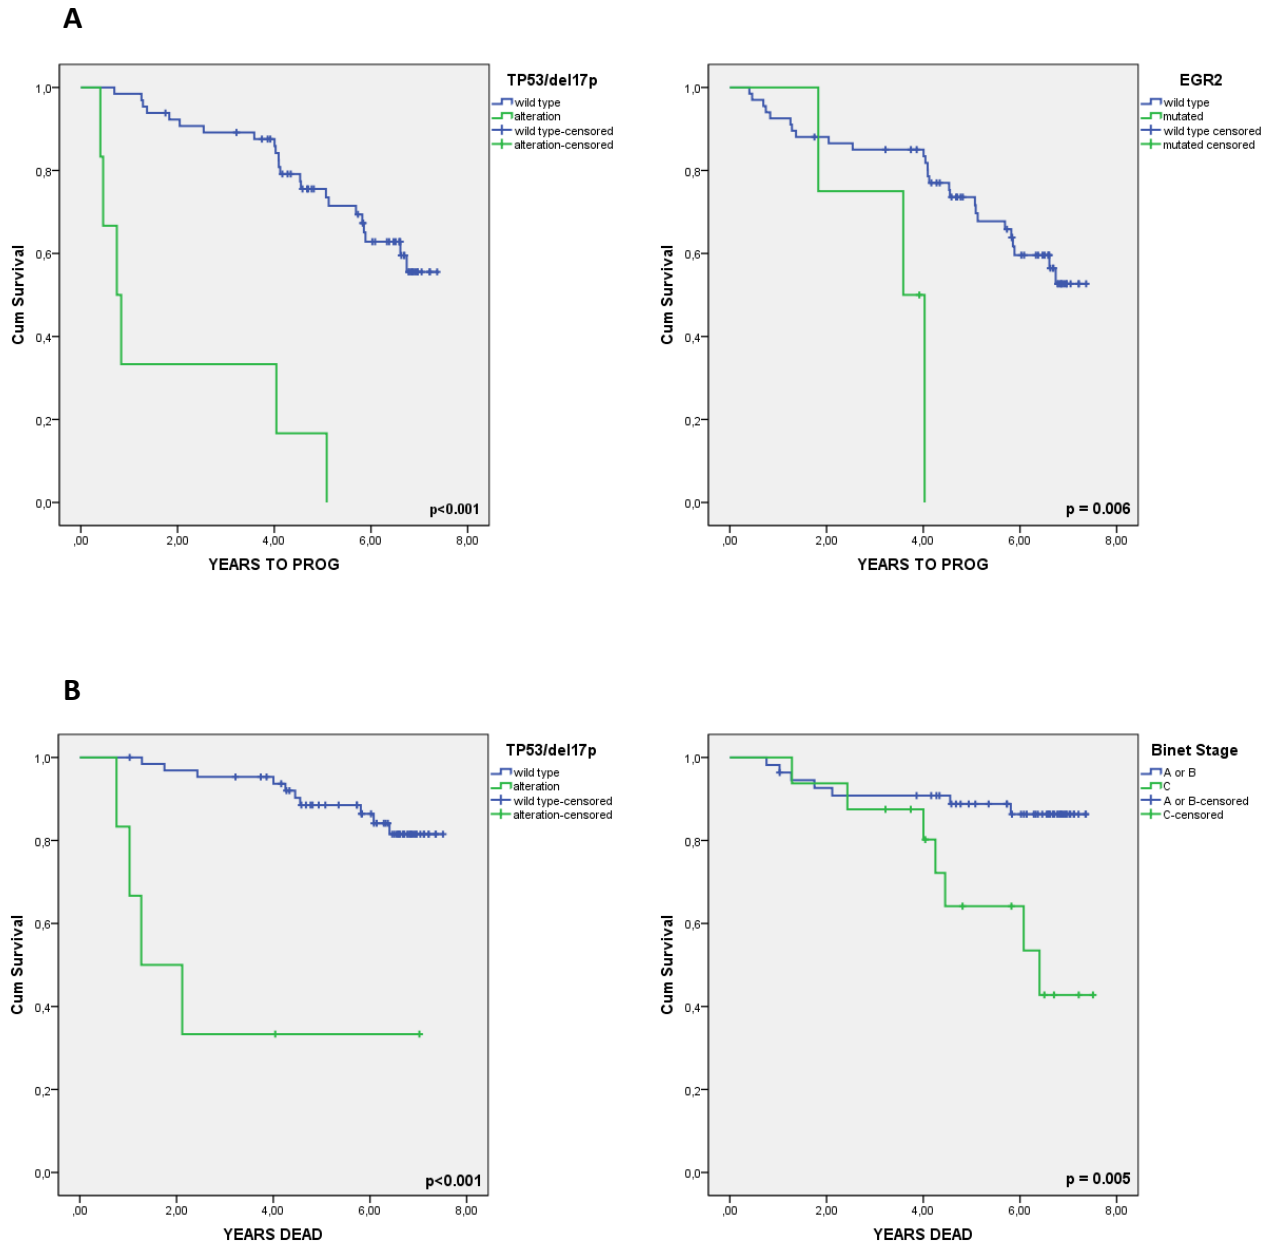

Supplement: pone.0257353.s002.pdf [file pone.0257353.s002.pdf]
